# Supplementary material for: High Throughput Sequencing Technologies as a New Toolbox for Deep Analysis, Characterization and Potentially Authentication of Protection Designation of Origin Cheeses?
Source: Hindawi journal article supplement (doi:10.1155/2019/5837301), 2019-11-20
Supplement: f1 [file 5837301.f1.pdf]

Supplementary table 1 provides information about several PDO and other traditional cheeses discussed in the manuscript regarding the type of cheese, the milk source, their origin and the addition of starter cultures. Additionally, the table provides information for the methods of chesses' analysis, including the DNA/RNA extraction method, the primers and the region of their target gene and the sequencing platform used. Finally, the results of the metagenomics analysis as relative abundances of bacterial and/or fungal genera/species and the extracted from the analysis number of sequences are also shown.

**Table S1. Metagenomic studies on PDO and other traditional cheeses.** Differences in the relative abundance of microbes (bacterial and fungal representatives) based on the cheese type, the source of milk, the origin and the methods of analysis.

| Type of cheese                                              | Milk source       | Origin                              | Starter cultures            | Extraction method                                                              | Target region - Primers                                                                                                                      | Bacterial representatives                                                                                                                                                                                                                                                                                                                 | Fungal representatives | Number of sequences                                                                         | Reference                          |
|-------------------------------------------------------------|-------------------|-------------------------------------|-----------------------------|--------------------------------------------------------------------------------|----------------------------------------------------------------------------------------------------------------------------------------------|-------------------------------------------------------------------------------------------------------------------------------------------------------------------------------------------------------------------------------------------------------------------------------------------------------------------------------------------|------------------------|---------------------------------------------------------------------------------------------|------------------------------------|
| Sequencing platform: 454 pyrosequencing system FLX platform |                   |                                     |                             |                                                                                |                                                                                                                                              |                                                                                                                                                                                                                                                                                                                                           |                        |                                                                                             |                                    |
| Istrian cheese                                              | raw, sheep milk   | Istria                              | no                          | Maxwell Tissue DNA Purification Kit (Promega, Madison, USA).                   | 927f (5'-AACTYAAAKGAATTG ACGG-3', <i>E. coli</i> position 908–927) and 630r (5'-CAKAAAGGAGGTGATC C-3', <i>E. coli</i> position 1529 to 1545) | <b>Farm 1.</b> <i>L. lactis</i> : 86.47%, <i>Enterococcus spp.</i> 7.05%. <b>Farm 2.</b> <i>L. lactis</i> : 3.89%, <i>Enterococcus spp.</i> 42.65%, <i>L. mesenteroides</i> : 1.39%, <i>S. parauberis</i> : 40.33%, <i>S. saprophyticus</i> : 1.14%, <i>E.coli/Shigella flexneri</i> : 3.14%                                              | Not analyzed           | 50544 high-quality partial 16S rRNA gene sequences, in average 2777 sequences per treatment | (Fuka <i>et al.</i> 2013)          |
| Krcki cheese                                                | raw, sheep milk   | Istria                              | no                          |                                                                                |                                                                                                                                              | <b>Farm 1.</b> <i>L. lactis</i> : 99.22%. <b>Farm 2.</b> <i>L. lactis</i> : 83.37%, <i>Pediococcus pentosaceus</i> : 2.10%, <i>L. acidipiscis</i> : 2.96%, <i>S. gallolyticus</i> : 5.87%, <i>S. saprophyticus</i> : 2.67%                                                                                                                | Not analyzed           |                                                                                             |                                    |
| Paski cheese                                                | raw, sheep milk   | Istria                              | no                          |                                                                                |                                                                                                                                              | <b>Farm 1.</b> <i>L. lactis</i> : 11.37%, <i>Enterococcus spp.</i> 64.60%, <i>L. mesenteroides</i> : 14.48%, <i>S. gallolyticus</i> : 1.22%, <i>E.coli/Shigella flexneri</i> : 0.34%. <b>Farm 2.</b> <i>L. lactis</i> : 36.75%, <i>Enterococcus spp.</i> 48.22%, <i>L. mesenteroides</i> : 1.46%, <i>S. parauberis</i> : 2.59%            | Not analyzed           |                                                                                             |                                    |
| Poro cheese                                                 | Holstein cow milk | river zone of Tabasco, Mexico       | fermented whey              | phenol-chloroform DNA isolation                                                | V1–V3 region: 27Fmod and 530R                                                                                                                | >90% <i>Streptococcus</i> and <i>Lactobacillus</i> . Most representative species: <i>S. salivarius</i> subsp. <i>thermophilus</i> and <i>L. delbrueckii</i> . Occasionally: <i>Staphylococcus</i> , <i>Acinetobacter</i> , <i>Chryseobacter</i> , <i>Bacillus</i> , <i>Sediminibacterium</i> , <i>Enterococcus</i> and <i>Lactococcus</i> | Not analyzed           | 693,746 reads. Total OTUs: 273 97% similarity                                               | (Aldrete-Tapia <i>et al.</i> 2014) |
| Fiore Sardo (FS) ewes' milk cheese                          | raw ewes' milk &  | Sepi Formaggi, Italy                | lamb rennet paste           | RiboPure™ —Bacteria Kit (Ambion RNA, Life Technologies Co., Carlsbad, CA, USA) | V1–V3 region ( <i>Escherichia coli</i> position 27–519, forward 28F and reverse 519R                                                         | <i>Lactococcus</i> : 82.4 to 91.8%, <i>Streptococcus</i> : 7.8 to 14.9% and <i>Lactobacillus</i> : 0.4 to 2.6%. <i>L. lactis</i> : 82.4 to 91.8%, <i>S. thermophilus</i> : 7.8 to 14.9%, <i>Lactobacillus</i> sp.: 0.3 to 2.1%.                                                                                                           | Not analyzed           | FS: 50,290 PS: 34,932 PT: 57,640 ESC: >99%. 29, 51 and 29 OUT respectively.                 | (De Pasquale <i>et al.</i> 2016)   |
| Pecorino Siciliano (PS) ewes' milk cheese                   | raw ewes' milk    | Casa del Formaggio Sant'Anna, Italy | lamb rennet paste           |                                                                                |                                                                                                                                              | <i>Lactobacillus</i> : 26.0 to 66.3%, <i>Streptococcus</i> : 32.7 to 73.8%, <i>Enterococcus</i> : 0.1 to 0.7%, <i>Staphylococcus</i> : 0.1 to 2.4%, <i>S. thermophilus</i> : 44.5 to 72.3%, <i>L. delbrueckii</i> : 7.2 to 10.9%, <i>Lactobacillus</i> sp.: 51.3 to 58.8%.                                                                | Not analyzed           |                                                                                             |                                    |
| Pecorino Toscano (PT)                                       | pasteurized       | Spadi Enzo, Italy                   | <i>Lactococcus lactis</i> - |                                                                                |                                                                                                                                              | <i>Lactococcus</i> : 90.9 to 99.9%, <i>Brachyбактерium</i> : 0.02 to 0.9%, <i>Arthrobacter</i> : 0.05 to 0.2%, <i>Brevibacterium</i> : 0.1 to 4.4%, <i>Halomonas</i> 0.1 to 2.6%. <i>Lc. lactis</i> : 90.9 to 99.9%.                                                                                                                      | Not analyzed           |                                                                                             |                                    |

|                                                                                                               |                                |                                                            |                                                                                                                                |                                                                                 |                                                                                                                           |                                                                                                                                                                                                                                                                                                                                                                                      |              |                                                                               |                           |
|---------------------------------------------------------------------------------------------------------------|--------------------------------|------------------------------------------------------------|--------------------------------------------------------------------------------------------------------------------------------|---------------------------------------------------------------------------------|---------------------------------------------------------------------------------------------------------------------------|--------------------------------------------------------------------------------------------------------------------------------------------------------------------------------------------------------------------------------------------------------------------------------------------------------------------------------------------------------------------------------------|--------------|-------------------------------------------------------------------------------|---------------------------|
| ewes' milk cheese                                                                                             | ewes' milk                     |                                                            | calf rennet paste                                                                                                              |                                                                                 |                                                                                                                           |                                                                                                                                                                                                                                                                                                                                                                                      |              |                                                                               |                           |
| Caciocavallo Pugliese cheese                                                                                  | raw cows' milk                 | Noci, Bari (Apulia), Italy.                                | <i>Streptococcus thermophilus</i>                                                                                              | RiboPure bacterial kit (Ambion RNA; USA)                                        | V1-V3 region ( <i>E. coli</i> positions 27 to 519; 28F and 519R) of the 16S rRNA                                          | 90 <sup>th</sup> day: <i>Lactobacillus</i> sp. 2.13% <i>Lactobacillus casei</i> : 3.28%, <i>Lactobacillus paracasei</i> : 10.86%, <i>Streptococcus</i> sp.: 16.60%, <i>Streptococcus thermophilus</i> : 66.42%                                                                                                                                                                       | Not analyzed | 197,385 raw sequence reads ESC >99%                                           | (De Pasquale et al. 2014) |
| Pico cheese                                                                                                   | Raw milk                       | Azores (Portugal)                                          | animal rennet                                                                                                                  | Invisorb Spin Tissue mini-kit                                                   | e V3 and V4 region, forward primer 5'-ACTCCTACGGGAGGCA G-3' and reverse primer 5'-TACNVRRGTHCTAATY C-3'                   | <i>Lactococcus</i> : 77.734%, <i>Staphylococcus</i> : 1.329%, <i>Exiguobacterium</i> : 1.042%, <i>Acinetobacter</i> : 7.316%                                                                                                                                                                                                                                                         | Not analyzed | 65,746, 72,592 and 63,371 from cheese-makers A, B and C respectively ESC >99% | (Riquelme et al. 2015)    |
|                                                                                                               | Raw milk                       |                                                            | animal rennet                                                                                                                  |                                                                                 |                                                                                                                           | <i>Lactococcus</i> : 75.032%, <i>Streptococcus</i> : 13.197%, <i>Enterococcus</i> : 4.047%, <i>Macrococcus</i> : 1.079%, <i>Acinetobacter</i> : 2.85%                                                                                                                                                                                                                                | Not analyzed |                                                                               |                           |
|                                                                                                               | Raw milk                       |                                                            | animal rennet                                                                                                                  |                                                                                 |                                                                                                                           | <i>Lactococcus</i> : 78.811%, <i>Streptococcus</i> : 2.716%, <i>Lactobacillus</i> : 1.39%, <i>Acinetobacter</i> : 2.47%, <i>Marinomonas</i> : 1.191%, <i>Pseudomonas</i> : 1.447%                                                                                                                                                                                                    | Not analyzed |                                                                               |                           |
|                                                                                                               | pasteurized cow milk           |                                                            | DELVO®TEC DX-33, DSM, The Netherlands                                                                                          |                                                                                 |                                                                                                                           | <i>Lactococcus</i> : 77.119%, <i>Streptococcus</i> : 9.119%, <i>Enterococcus</i> : 9.004%, <i>Lactobacillus</i> : 2.990%                                                                                                                                                                                                                                                             | Not analyzed |                                                                               |                           |
| Oscypek scalded-smoked cheese                                                                                 | raw sheep's milk               | Tatra Mountains Poland                                     | No                                                                                                                             | Genomic Mini DNA purification kit                                               | V5 and V6 regions of the 16S rRNA gene                                                                                    | <b>Curd:</b> <i>Leuconostoc</i> : 3.121%, <i>Lactococcus</i> : 64.936%, <i>Streptococcus</i> : 6.356%. <b>Fresh:</b> <i>Lactobacillus</i> : 1.522%, <i>Leuconostoc</i> : 2.355%, <i>Lactococcus</i> : 68.846%, <i>Streptococcus</i> : 5.181%. <b>Smoked:</b> <i>Lactobacillus</i> : 1.68%, <i>Leuconostoc</i> : 2.115%, <i>Lactococcus</i> : 75.473%, <i>Streptococcus</i> : 4.130%. | Not analyzed | Curd: 5.179<br>Fresh cheese: 59.451<br>Smoked cheese 46,894<br>ESC 99%        | (Alegría et al. 2012)     |
| Sequencing platform: 454 pyrosequencing on a GS Junior platform (454 Life Sciences, Roche Diagnostics, Italy) |                                |                                                            |                                                                                                                                |                                                                                 |                                                                                                                           |                                                                                                                                                                                                                                                                                                                                                                                      |              |                                                                               |                           |
| Traditional mozzarella cheese                                                                                 | whole raw water buffalo's milk | southern Italy, provinces of Salerno (M1) and Caserta (M2) | NWC1: <i>S.thermophilus</i> , <i>L.delbrueckii</i> , <i>L.helveticus</i> . NW C2: <i>S.thermophilus</i> , <i>L.delbrueckii</i> | Biostic bacteremia DNA isolation kit (Mo Bio Laboratories, Inc., Carlsbad, CA). | V1-V3 region of the 16S rRNA gene by using the primers Gray28F (5'-TTTGATCNTGGCTCAG) and Gray519r (5'-GTNTTACNGCGGCKGCTG) | <b>M1:</b> <i>L.delbrueckii</i> : 8%, <i>L. helveticus</i> : 20%, <i>L.kefiranoferiens</i> : 10%, <i>Lactobacillus</i> sp.: 10%, <i>S. thermophilus</i> : 45%.<br><b>M2:</b> <i>L. delbrueckii</i> : 48%, <i>L.lactis</i> : 3%, <i>S.thermophilus</i> : 40%.                                                                                                                         | Not analyzed | 10,219 for M1 and 5,056 for M2. ESC >93.6%                                    | (Ercolini et al. 2012)    |
| PDO Canestra to Pugliese cheese                                                                               | raw ewes' milk                 | Biccari, Foggia, Apulia region, Italy.                     | -                                                                                                                              | RiboPure-Bacteria kit                                                           | V1-V3 region                                                                                                              | 90 days of ripening: <i>Lactococcus</i> : 87.2% ( <i>L. lactis</i> , <i>L. garvieae</i> & <i>L. raffinolactis</i> ) <i>Lactobacillus</i> (4.8%) & <i>Leuconostoc</i> (3.9%).                                                                                                                                                                                                         | Not analyzed | 66,924 raw sequence reads ESC >99%                                            | (De Pasquale et al. 2014) |
| hard-pressed Grana-type cheese                                                                                | Frisona cow raw milk           | Piedmont region, northwest Italy                           | whey starter                                                                                                                   | (Rantsiou et al. 2008) & Master-Pure complete DNA and RNA purification kit      | V1 to V3 region                                                                                                           | D batch: <i>L. casei</i> : 37%, <i>L. brevis</i> : 6.8% and <i>S. thermophilus</i> : 10.8%<br>F batch: <i>P. acnes</i> : 42%, <i>Staphylococcus</i> : 5%.<br>Batch E: <i>L. helveticus</i> , <i>L. casei</i> & <i>L. delbrueckii</i> ~70%, <i>S. thermophilus</i> , <i>P. acnes</i> ~20%.                                                                                            | Not analyzed | 148,944 reads passed filters, average: 3,819 reads/sample ESC >99%            | (Alessandria et al. 2016) |

|                     |                          |                                                      |                       |                                                                                 |                                                                                                                                                                       |                                                                                                                                                                                                                                                                                                                                                                                                                                                                                                                                                                      |                                                                                                                                                                                                                                                                                                                                                                                                                            |                                                                              |                                  |
|---------------------|--------------------------|------------------------------------------------------|-----------------------|---------------------------------------------------------------------------------|-----------------------------------------------------------------------------------------------------------------------------------------------------------------------|----------------------------------------------------------------------------------------------------------------------------------------------------------------------------------------------------------------------------------------------------------------------------------------------------------------------------------------------------------------------------------------------------------------------------------------------------------------------------------------------------------------------------------------------------------------------|----------------------------------------------------------------------------------------------------------------------------------------------------------------------------------------------------------------------------------------------------------------------------------------------------------------------------------------------------------------------------------------------------------------------------|------------------------------------------------------------------------------|----------------------------------|
| Ricotta cheese      | -                        | Campania region (Southern Italy) province of Salerno | whey starter          | Biostic Bacteremia DNA isolation kit (Mo Bio Laboratories, Inc., Carlsbad, CA). | V1-to-V3 region of the 16S rRNA gene D1-D2 domain of the 26S rRNA gene, using the primers NL-1 (5'-GCATATCAATAAGCGG AGGAAAAG-3') and NL-4 (5'-GGTCCGTGTTTCAAGACGG-3') | <i>Chryseobacterium</i> : 2%, <i>Chryseobacterium bovis</i> : 1%, <i>Wautersiella</i> : 1%, <i>Sphingobacterium faecium</i> : 4%, <i>Exiguobacterium</i> : 1%, <i>Lactobacillus zeae</i> : 1%, <i>Kurthiagibsonii</i> : 1%, <i>S. thermophilus</i> : 25%, <i>Agrobacterium</i> : 1%, <i>Comamonas</i> : 2%, <i>Delftia</i> : 1%, <i>Aeromonas</i> : 3%, <i>Acinetobacter</i> : 2%, <i>Acinetobacter johnsonii</i> : 4%, <i>Acinetobacter</i> : 1%, <i>Pseudomonas</i> : 30%, <i>Shewanella</i> : 8%, <i>Vibrio</i> <i>oiensis</i> : 1%, <i>Stenotrophomonas</i> : 2% | <i>Penicillium solitum</i> : 19%, <i>Debaryomyces hansenii</i> : 28%, <i>Yamadazyma triangularis</i> : 46%, <i>Candida pararugosa</i> : 4%, <i>Cryptococcus curvatus</i> : 1%, <i>Trichosporon faecale</i> : 2%                                                                                                                                                                                                            | A total of 117,490 reads passed the filters, ESC 99%                         | (Stellato <i>et al.</i> 2015)    |
| mozzarella cheese   | -                        |                                                      | natural whey cultures |                                                                                 |                                                                                                                                                                       | <i>Chryseobacterium</i> : 1%, <i>Leuconostoc</i> : 13%, <i>Lactococcus</i> : 1%, <i>Streptococcus thermophilus</i> : 75%, <i>Pseudomonas</i> : 5%, <i>Shewanella</i> : 1%                                                                                                                                                                                                                                                                                                                                                                                            | <i>P. solitum</i> : 6%, <i>D. hansenii</i> : 19%, <i>Y. triangularis</i> : 52%, <i>Dipodascus capitatus</i> : 2%, <i>Galactomyces geotrichum</i> : 5%, <i>Geotrichum klebahnii</i> : 1%, <i>Candida pararugosa</i> : 3%, <i>C. zeylanoides</i> : 1%, <i>Kluyveromyces marxianus</i> : 1%, <i>Rhodotorula glutinis</i> : 1%, <i>C. curvatus</i> : 1%, <i>T. faecale</i> : 5%, <i>T. lactis</i> : 1%, <i>T. quehoae</i> : 1% |                                                                              |                                  |
| Caciocavallo cheese | -                        |                                                      | natural whey cultures |                                                                                 |                                                                                                                                                                       | <i>Lactobacillus</i> : 4%, <i>Lactobacillus delbrueckii</i> : 6%, <i>Lactobacillus helveticus</i> : 2%, <i>Lactobacillus zeae</i> : 13%, <i>Streptococcus thermophilus</i> : 72%.                                                                                                                                                                                                                                                                                                                                                                                    | <i>P. solitum</i> : 1%, <i>D. hansenii</i> : 4%, <i>Y. triangularis</i> : 12%, <i>D. capitatus</i> : 11%, <i>G. geotrichum</i> : 4%, <i>Geotrichum fragrans</i> : 5%, <i>C. pararugosa</i> : 3%, <i>K. marxianus</i> : 41%, <i>Saccharomyces cerevisiae</i> : 8%, <i>C. curvatus</i> : 1%, <i>T. faecale</i> : 4%, <i>T. lactis</i> : 2%, <i>T. quehoae</i> : 1%                                                           |                                                                              |                                  |
| Grancacio cheese    | -                        |                                                      | natural whey cultures |                                                                                 |                                                                                                                                                                       | <i>Lactobacillus</i> : 1%, <i>Lactobacillus delbrueckii</i> : 7%, <i>Lactobacillus zeae</i> : 14%, <i>Streptococcus thermophilus</i> : 68%, <i>Chromohalobacter Canadensis</i> : 2%, <i>Pseudomonas</i> : 4%, <i>Shewanella</i> : 1%                                                                                                                                                                                                                                                                                                                                 | <i>P. solitum</i> : 3%, <i>D. hansenii</i> : 12%, <i>Y. triangularis</i> : 79%, <i>C. pararugosa</i> : 1%, <i>T. faecale</i> : 2%                                                                                                                                                                                                                                                                                          |                                                                              |                                  |
| Scamorza cheese     | -                        |                                                      | natural whey cultures |                                                                                 |                                                                                                                                                                       | <i>Chryseobacterium</i> : 1%, <i>Lactobacillus helveticus</i> : 1%, <i>Leuconostoc</i> : 11%, <i>Lactococcus</i> : 1%, <i>Lactococcus lactis</i> : 1%, <i>Streptococcus thermophilus</i> : 71%, <i>Arcobacter</i> : 2%, <i>Aeromonas</i> : 1%, <i>Acinetobacter</i> : 1%, <i>Acinetobacter johnsonii</i> : 1%, <i>Pseudomonas</i> : 5%, <i>Shewanella</i> : 1%.                                                                                                                                                                                                      | <i>P. solitum</i> : 8%, <i>D. hansenii</i> : 19%, <i>Y. triangularis</i> : 45%, <i>D. capitatus</i> : 1%, <i>G. geotrichum</i> : 9%, <i>G. fragrans</i> : 1%, <i>G. klebahnii</i> : 1%, <i>C. pararugosa</i> : 2%, <i>K. marxianus</i> : 2%, <i>R. glutinis</i> : 1%, <i>C. curvatus</i> : 1%, <i>T. faecale</i> : 4%, <i>T. lactis</i> : 1%, <i>T. quehoae</i> : 4%                                                       |                                                                              |                                  |
| Mozzarella cheese   | raw water buffalo's milk | Campania region, Southern Italy                      | natural whey cultures | Biostic bacteremia DNA isolation kit (Mo Bio Laboratories, Inc., Carlsbad, CA). | V1-V3 region of the 16S rRNA                                                                                                                                          | <i>S. thermophilus</i> 70%, <i>Lactococcus lactis</i> 13%, <i>Lb. fermentum</i> 12%                                                                                                                                                                                                                                                                                                                                                                                                                                                                                  | Not analyzed                                                                                                                                                                                                                                                                                                                                                                                                               | 221,903 reads passed the filters, average value: 4,191 reads/sample ESC >99% | (De Filippis <i>et al.</i> 2014) |
| Grana Padano        | Raw cow's milk           | Grana Padano Northern Italy                          | natural whey cultures |                                                                                 |                                                                                                                                                                       | <i>Lb. delbrueckii</i> & <i>Lb. helveticus</i> 59%, <i>S. thermophilus</i> >24%,                                                                                                                                                                                                                                                                                                                                                                                                                                                                                     | Not analyzed                                                                                                                                                                                                                                                                                                                                                                                                               |                                                                              |                                  |

|                                                           |                        |                                     |                                                                                                                                                                                 |                                                                               |                                                                       |                                                                                                                                                                                                                                                                                                                                                                                                                                                                                                                                                                                                                                                                                                                                                                                                                                                                                                                                                                                                                                                                                                                            |              |                                                                              |                                      |
|-----------------------------------------------------------|------------------------|-------------------------------------|---------------------------------------------------------------------------------------------------------------------------------------------------------------------------------|-------------------------------------------------------------------------------|-----------------------------------------------------------------------|----------------------------------------------------------------------------------------------------------------------------------------------------------------------------------------------------------------------------------------------------------------------------------------------------------------------------------------------------------------------------------------------------------------------------------------------------------------------------------------------------------------------------------------------------------------------------------------------------------------------------------------------------------------------------------------------------------------------------------------------------------------------------------------------------------------------------------------------------------------------------------------------------------------------------------------------------------------------------------------------------------------------------------------------------------------------------------------------------------------------------|--------------|------------------------------------------------------------------------------|--------------------------------------|
| Parmigiano Reggiano                                       | raw, cow's milk        | Parmigiano Reggiano, Northern Italy | natural whey cultures                                                                                                                                                           |                                                                               |                                                                       | <i>Lb. delbrueckii</i> & <i>Lb. helveticus</i> were 93%, <i>S. thermophilus</i> in lower abundance                                                                                                                                                                                                                                                                                                                                                                                                                                                                                                                                                                                                                                                                                                                                                                                                                                                                                                                                                                                                                         | Not analyzed |                                                                              |                                      |
| Fontina (PDO) cheese                                      | raw cow's milk         | Northwest Italy (Aosta Valley)      | <i>S. thermophilus</i> , <i>L. delbrueckii</i> and <i>L. lactis</i>                                                                                                             | (Rantsiou <i>et al.</i> 2008)                                                 | V1–V3 region of the 16S rRNA gene by using primers Gray28f & Gray519r | <i>S. thermophilus</i> & <i>L. delbrueckii</i> , <i>L. casei</i> , <i>L. lactis</i> in some samples with a very low incidence, <i>Enterobacteriaceae</i> , <i>Pseudomonas</i> and <i>P. acnes</i> were detected with moderate incidence                                                                                                                                                                                                                                                                                                                                                                                                                                                                                                                                                                                                                                                                                                                                                                                                                                                                                    | Not analyzed | 134,171 reads passed filters, average: 4969 reads/sample ESC > 97%           | (Dolci <i>et al.</i> 2014)           |
| High-moisture Mozzarella cheese                           | cow's milk             | Italian market                      | <i>S. thermophilus</i> , <i>L. delbrueckii</i> , <i>L. helveticus</i> , <i>L. lactis</i> , <i>Leuconostoc</i> , <i>Enterococcus</i>                                             | MoBio Power food Bacterial DNA Extraction kit (MO BIO Laboratories Inc., USA) | V1–V3 region of the 16S rRNA gene Primers Gray28F & Gray519r          | Cheeses produced by direct citric acid addition: starter microorganisms: 6 to 40%. Psychrotrophic taxa and <i>Pseudomonas</i> : highest median frequency. Cheeses produced by addition of defined starter cultures: <i>S. thermophilus</i> the dominant microorganisms and the lowest contamination with psychrotrophs, contaminants and LAB. The third group of samples: increased variability                                                                                                                                                                                                                                                                                                                                                                                                                                                                                                                                                                                                                                                                                                                            | Not analyzed | 133,331 reads passed filters, average value: 4597 reads/sample ESC > 99%     | (Guidone <i>et al.</i> 2016)         |
| Caciocavallo of Castelfranco cheese                       | raw cows' milk         | Campania region                     | natural whey cultures                                                                                                                                                           | Biostic TM Bacteremia DNA isolation kit (MO BIO).                             | V1-V3 region of 16S rRNA                                              | Hay (H): Cheese day 60: <i>Lactobacillus sp.</i> 6.29%, <i>L. casei</i> : 28.40%, <i>L. delbrueckii</i> : 0.68%, <i>S. thermophilus</i> : 62.13%<br>Silage (S): Cheese day 60: <i>Lactobacillus sp.</i> 3.55%, <i>L. casei</i> group: 9.38%, <i>L. delbrueckii</i> : 0.65%, <i>S. thermophilus</i> : 78.72%                                                                                                                                                                                                                                                                                                                                                                                                                                                                                                                                                                                                                                                                                                                                                                                                                | Not analyzed | 128,014 reads passed filters, average value: 7111.8 reads/samples ESC > 90%. | (Giello, M <i>et al.</i> 2017)       |
| Herve cheese                                              | Raw / pasteurized milk | Herve Belgium                       | Rennet, <i>Lactococcus lactis ssp. cremoris</i> , <i>Lactococcus lactis ssp. lactis</i> , <i>Lactococcus lactis ssp. cremoris</i> biovar diacetylactis, <i>Leuconostoc</i> spp. | DNeasy Blood & Tissue DNA extraction kit (Qiagen)                             | E9-29 and E514-530 (Brosius <i>et al.</i> , 1981)                     | Raw milk: Core: <i>L. lactis ssp. cremoris</i> : 79.5%), <i>Staphylococcus equorum</i> : 6.0%, <i>Psychrobacter celer</i> : 5.7%, <i>Streptococcus salivarius ssp. thermophilus</i> : 4.1%<br>Rind: <i>Corynebacterium casei</i> : 51.17%, <i>L. lactis ssp. cremoris</i> : 11.62%, <i>Staph. equorum</i> : 5.54%, <i>Marinilactibacillus psychrotolerans</i> : 4.55%, <i>Vagococcus salmoninarum</i> : 3.16%, <i>Psychrobacter spp.</i> : 2.94%, <i>Fusobacterium spp.</i> : 2.54%, <i>Clostridiisalibacter</i> : 2.48%, and <i>Strep. Salivarius</i> : 1.93%.<br>Pasteurized milk: Core: <i>L. lactis ssp. cremoris</i> : 76.87%, <i>Psychrobacter sp.</i> : 11.35%, and <i>Staph. equorum</i> : 6.57%<br>Rind: <i>Psychrobacter</i> : 37.76%, <i>L. lactis ssp. cremoris</i> : 10.76%, <i>C. casei</i> : 7.42%, <i>V. salmoninarum</i> : 5.69%, <i>Staph. equorum</i> : 5.28%, <i>Vibrio spp.</i> : 5.03%, <i>Fusobacterium spp.</i> : 4.39%, <i>M. psychrotolerans</i> : 3.69%, <i>Pseudoalteromonas spp.</i> : 2.71%, <i>Vagococcus fluvialis</i> 2.64%, and <i>Strep. salivarius</i> : 2.07%, <i>B. linens</i> : >2% | Not analyzed | 62,218 reads, 2,828 mean number per sample                                   | (Delcen serie V. <i>et al.</i> 2014) |
| Sequencing platform: MiSeq, Illumina (San Diego, CA, USA) |                        |                                     |                                                                                                                                                                                 |                                                                               |                                                                       |                                                                                                                                                                                                                                                                                                                                                                                                                                                                                                                                                                                                                                                                                                                                                                                                                                                                                                                                                                                                                                                                                                                            |              |                                                                              |                                      |
| Minas artisanal cheese                                    | raw cow's milk         | Serra do Salitre region,            | endogenous starter culture                                                                                                                                                      | (Quigley <i>et al.</i> 2011).                                                 | V3/4/5 hypervariable region of bacterial 16S rRNA genes               | Core: Dominant: <i>Streptococcus</i> , <i>Lactococcus</i> , <i>Lactobacillus</i><br>Rind: <i>Streptococcus</i> , <i>Lactococcus</i> , <i>Staphylococcus</i> , <i>Weissella</i> , <i>Leuconostoc</i> , family Planococcaceae                                                                                                                                                                                                                                                                                                                                                                                                                                                                                                                                                                                                                                                                                                                                                                                                                                                                                                | Not analyzed | Mean 50.223 read counts per sample, 1.202 OTUs                               | (F. M. Sant'Anna <i>et al.</i> )     |

|                                     |                  |                            |                                                                                                                             |                                                   |                                                                                 |                                                                                                                                                                                                                                                                                                                                                                                                                                                                                                                                                                                                                                                                                       |                                                                                                                                                                                                                                                              |                                                                                     |                               |
|-------------------------------------|------------------|----------------------------|-----------------------------------------------------------------------------------------------------------------------------|---------------------------------------------------|---------------------------------------------------------------------------------|---------------------------------------------------------------------------------------------------------------------------------------------------------------------------------------------------------------------------------------------------------------------------------------------------------------------------------------------------------------------------------------------------------------------------------------------------------------------------------------------------------------------------------------------------------------------------------------------------------------------------------------------------------------------------------------|--------------------------------------------------------------------------------------------------------------------------------------------------------------------------------------------------------------------------------------------------------------|-------------------------------------------------------------------------------------|-------------------------------|
|                                     |                  | Minas Gerais state, Brazil | called "pingo"                                                                                                              |                                                   |                                                                                 |                                                                                                                                                                                                                                                                                                                                                                                                                                                                                                                                                                                                                                                                                       |                                                                                                                                                                                                                                                              |                                                                                     | al., 2019)                    |
| Reblochon-style cheeses' rinds      | pasteurized milk | France                     | <i>S. thermophilus</i> , <i>L. bulgaricus</i> , & ripening: <i>B. aurantiacum</i> & <i>D. hansenii</i> <i>G. candidum</i>   | (Dugat-Bony et al. 2015)                          | V3V4 region of the 16S rRNA gene with the primers F343 and R784                 | <i>S. thermophilus</i> : 75.780%, <i>L. delbrueckii</i> : 11.029%, <i>L. casei</i> : 9.179%                                                                                                                                                                                                                                                                                                                                                                                                                                                                                                                                                                                           | Not analyzed                                                                                                                                                                                                                                                 | 70 to 91 million sequencing reads generated from each of the 12 cheese rind samples | (Monn et al. 2016)            |
| Cantal cheeses                      | Cow milk         | Marcenat France            | <i>L. lactis</i> , <i>L. cremoris</i> , <i>L. mesenteroides</i>                                                             | mechanical lysis, phenol-based extraction.        | V3-V4 of the 16S rRNA gene. Primers: PCR1F_460 and PCR1R_460                    | Core: <i>L. lactis</i> : 97.4%. Rind: <i>Brevibacterium linens</i> : 1.87%, <i>Brachybacterium paraconglomeratum/sacelli</i> : 1.22%, <i>L. lactis</i> : 69.7%                                                                                                                                                                                                                                                                                                                                                                                                                                                                                                                        | Not analyzed                                                                                                                                                                                                                                                 | A total of 1,636,464 reads from 48 samples, 365 OTUs                                | (Frétin et al. 2018)          |
| Silter cheese                       | Raw cow milk     | Brescia (Northern Italy)   | <i>L. lactis</i> , <i>L. pseudomesenteroides</i> <i>L. mesenteroides</i> , <i>S. thermophilus</i>                           | (Cremonesi et al. 2006) with some modifications   | V3-V4 of the 16S rRNA gene.                                                     | Dairy: R; with selected autochthonous starter: <i>Streptococcus</i> : 87.6%, <i>Leuconostoc</i> : 3.1 %, <i>Lactobacillus</i> : 6.47%, <i>Lactococcus</i> : 1%<br>Dairy: R; without the selected autochthonous starter: <i>Streptococcus</i> : 81.5%, <i>Lactococcus</i> : 7.7%, <i>Lactobacillus</i> : 2.56%, <i>Leuconostoc</i> : 5.34%<br>Dairy: B; with the selected autochthonous starter: <i>Streptococcus</i> : 86.6%, <i>Lactococcus</i> : 1%, <i>Lactobacillus</i> : 13%, <i>Leuconostoc</i> : 2.76%<br>Dairy: B; without the selected autochthonous starter: <i>Streptococcus</i> : 80%, <i>Lactococcus</i> : 4.4%, <i>Lactobacillus</i> : 7.87%, <i>Leuconostoc</i> : 0.9% | Not analyzed                                                                                                                                                                                                                                                 | 20.928.344 raw reads                                                                | (Silveti et al. 2017)         |
| semi-hard Swiss-type Maasdam cheese | pasteurized milk | Switzerland                | <i>L. lactis</i> and <i>L. cremoris</i> <i>P. shermanii</i> , <i>L. rhamnosus</i> <i>L. helveticus</i> as adjunct cultures. | Wizard® genomic DNA Purification Kit (Promega)    | Adaptors only                                                                   | <b>Cold ripening:</b> <i>L. lactis</i> : 85.554%, <i>L. helveticus</i> : 11.375%, <i>P. shermanii</i> : 0.9%, <i>L. rhamnosus</i> : 1.05%, <i>S. thermophilus</i> : 1.2%,<br><b>Warm ripening:</b> <i>L. lactis</i> : 82.5%, <i>L. helveticus</i> : 10.5%                                                                                                                                                                                                                                                                                                                                                                                                                             | Not analyzed                                                                                                                                                                                                                                                 | 17 million high quality reads were obtained                                         | (Duru et al. 2018)            |
| Serpa cheese                        | raw ewes' milk   | Portugal                   | dried flowers from <i>Cynara cardunculus</i> <i>L. as rennet</i>                                                            | PowerFood Microbial DNA Isolation kit (MoBio USA) | F: ITS3NGS1, ITS3NGS2, ITS3NGS3, ITS3NGS4, ITS3NGS5, & ITS3NGS10. R: ITS3NGS001 | Not analyzed                                                                                                                                                                                                                                                                                                                                                                                                                                                                                                                                                                                                                                                                          | <i>Cryptococcus</i> , <i>Hanseniaspora</i> , <i>Saccharomyces</i> , <i>Kluyveromyces</i> , <i>Debaryomyces</i> , <i>Pichia</i> , <i>Metschnikowia</i> , <i>Yarrowia</i> , <i>Candida</i> , <i>Galactomyces</i> , <i>Penicillium</i> , & <i>Basidiomycota</i> | Not mentioned                                                                       | (Gonçalves DSMTP et al. 2017) |

|                                                                                   |                  |                           |                                                                                                                                                                                                                                                                                         |                                                      |                                                                                                                                   |                                                                                                                                                                                                                                                                                                                                                                                                                                                                                                                                                                                                                                                                                                                                                                                                                                                                                                                                                                                                                                                                                                                                                                                                                                                                                                                     |              |                                                                                   |                              |
|-----------------------------------------------------------------------------------|------------------|---------------------------|-----------------------------------------------------------------------------------------------------------------------------------------------------------------------------------------------------------------------------------------------------------------------------------------|------------------------------------------------------|-----------------------------------------------------------------------------------------------------------------------------------|---------------------------------------------------------------------------------------------------------------------------------------------------------------------------------------------------------------------------------------------------------------------------------------------------------------------------------------------------------------------------------------------------------------------------------------------------------------------------------------------------------------------------------------------------------------------------------------------------------------------------------------------------------------------------------------------------------------------------------------------------------------------------------------------------------------------------------------------------------------------------------------------------------------------------------------------------------------------------------------------------------------------------------------------------------------------------------------------------------------------------------------------------------------------------------------------------------------------------------------------------------------------------------------------------------------------|--------------|-----------------------------------------------------------------------------------|------------------------------|
| Dutch-type cheese                                                                 | Pasteurized milk | Netherlands               | freeze-dried CH-N 19 starter                                                                                                                                                                                                                                                            | UltraClean® GelSpin® DNA Extraction Kit (Mobio, USA) | V3 and V4 of the bacterial 16S rRNA gene. primers: Uni340F & Bac806R                                                              | 99.9%: <i>Lactococcus</i> ( <i>L. lactis/cremoris</i> , <i>L. raffinolactis</i> & <i>L. chungangensis</i> ), <i>Leuconostoc</i> ( <i>L. mesenteroides</i> & <i>pseudomesenteroides</i> ) and <i>Lactobacillus</i> ( <i>L. curvatus/sakei</i> & <i>Lactobacillus</i> spp.                                                                                                                                                                                                                                                                                                                                                                                                                                                                                                                                                                                                                                                                                                                                                                                                                                                                                                                                                                                                                                            | Not analyzed | 2,905,499 high quality sequences, 69 OTUs                                         | (Porcellato et al. 2016)     |
| Tomme d'Orchies                                                                   | Cow raw milk     | France                    | PAL114D ( <i>L. lactis</i> , <i>L. cremoris</i> , <i>L. lactis biovar diacetylactis</i> , <i>S. thermophilus</i> , <i>Lb. helveticus</i> , <i>Lb. lactis</i> ), <i>Propionibacterium</i> PAL25-2 ( <i>P. freudenreichii</i> subsp. <i>shermanii</i> ) and <i>D. hansenii</i> (PAL DH10) | DNeasy Blood & Tissue DNA extraction kit             | V1–V3 hypervariable regions, forward (5'CGGCAGCGTCAGAT GTGTATAAGAGACAG-3') and reverse (5'-GTVTVGTGGGCTCGGAGATGTGTATAAGAGACAG-3') | Core: Day 0: <i>Lactococcus lactis</i> : 30.97%, <i>Lactococcus cremoris</i> : 24.96%, <i>Lactococcus</i> sp.: 10.16%, <i>Streptococcus thermophilus</i> : 25.17%, <i>Streptococcus</i> sp. 4.30%.<br>Day 21: <i>Lactococcus lactis</i> : 6.28%, <i>Lactococcus cremoris</i> : 1.96%, <i>Streptococcus thermophilus</i> : 78.71%, <i>Streptococcus</i> sp. 9.58%.<br><br>Surface: Day 0: <i>Lactococcus lactis</i> : 12.29%, <i>Lactococcus cremoris</i> : 2.60%, <i>Lactococcus</i> sp.: 4.83%, <i>Corynebacterium variabile</i> : 8.74%, <i>Corynebacterium flavescens</i> : 4.36%, <i>Corynebacterium</i> sp. 2.84%, <i>Lactobacillus helveticus</i> : 10.76%, <i>Lactobacillus capillatus</i> : 3.54%, <i>Lactobacillus rhamnosus</i> : 1.23%, <i>Lactobacillus</i> sp.: 8.51%, <i>Streptococcus thermophilus</i> : 8.24%, <i>Streptococcus</i> sp. 1.97%, <i>Brevibacterium linens</i> : 3.68%.<br>Day 21: <i>Corynebacterium variabile</i> : 19.76%, <i>Corynebacterium flavescens</i> : 1.32%, <i>Corynebacterium casei</i> : 1.41%, <i>Corynebacterium</i> sp.: 3.93%, <i>Lactobacillus</i> sp.: 1.15%, <i>Brevibacterium linens</i> : 1.56%, <i>Leucobacter chromiireducens</i> : 5.46%, <i>Peptostreptococcus russelli</i> : 4.02%, <i>Psychrobacter celer</i> : 12.98%, <i>Psychrobacter</i> sp.: 12.46% | Not analyzed | Not mentioned                                                                     | (Ceugniet et al. 2017)       |
| Plaisentif                                                                        | Cow raw milk     | Piedmont region, Italy    | no                                                                                                                                                                                                                                                                                      | Dneasy Blood & Tissue kit (Qiagen)                   | V4 region of the bacterial 16S rRNA gene, universal primers 515F and 806R                                                         | <i>Lactococcus</i> , <i>Lactobacillus</i> and <i>Streptococcus</i> (40% and more than 90%), <i>Leuconostoc</i> , <i>Enterococcus</i> , <i>Acinetobacter</i> , <i>Chryseobacterium</i> , <i>Staphylococcus</i> , <i>Enhydrobacter</i> , <i>Sphingomonas</i> , <i>Bacillus</i> , <i>Corynebacterium</i> , <i>Pseudomonas</i> . (1%–0.01%), <i>Granulicatella</i> , <i>Brevibacterium</i> , <i>Salinicoccus</i> , <i>Vagococcus</i> , <i>Anaerobacillus</i> , <i>Sphingobacterium</i> , <i>Klebsiella</i> , <i>Carnobacterium</i> , <i>Pediococcus</i> , <i>Brachybacterium</i> , <i>Morganella</i> Erwinia, <i>Psychrobacter</i> , <i>Ralstonia</i> , <i>Veillonella</i> , <i>Cloacibacterium</i> , <i>Actinomyces</i> , <i>Flavobacterium</i> , <i>Capnocytophaga</i> (0.01%–0.0001%)                                                                                                                                                                                                                                                                                                                                                                                                                                                                                                                                | Not analyzed | 2,819,261 high-quality 16S rDNA gene sequences, average sequence length of 252 bp | (Dalmaso et al., 2016)       |
| Sequencing platform: Illumina HiSeq 2000 (Harvard FAS Center for Systems Biology) |                  |                           |                                                                                                                                                                                                                                                                                         |                                                      |                                                                                                                                   |                                                                                                                                                                                                                                                                                                                                                                                                                                                                                                                                                                                                                                                                                                                                                                                                                                                                                                                                                                                                                                                                                                                                                                                                                                                                                                                     |              |                                                                                   |                              |
| Cotija cheese                                                                     | raw cow milk     | Mexico                    | no                                                                                                                                                                                                                                                                                      | phenol-chloroform method                             | -                                                                                                                                 | 80%: <i>L. plantarum</i> , <i>L. mesenteroides</i> and <i>W. paramesenteroides</i> . More than 1% and less than 10%: <i>Aerococcus</i> , <i>Enterococcus</i> , <i>Lactococcus</i> and <i>Staphylococcus</i> (subdominant population).                                                                                                                                                                                                                                                                                                                                                                                                                                                                                                                                                                                                                                                                                                                                                                                                                                                                                                                                                                                                                                                                               | Not analyzed | 1,165,460 16S rRNA reads extracted                                                | (Escobar-Zepeda et al. 2016) |
| Sequencing platform: PacBio RS II (Pacific Biosciences, Menlo Park, CA)           |                  |                           |                                                                                                                                                                                                                                                                                         |                                                      |                                                                                                                                   |                                                                                                                                                                                                                                                                                                                                                                                                                                                                                                                                                                                                                                                                                                                                                                                                                                                                                                                                                                                                                                                                                                                                                                                                                                                                                                                     |              |                                                                                   |                              |
| Buryatia                                                                          | raw cow milk     | Buryatia, Eastern Siberia | Handmade butter or cream                                                                                                                                                                                                                                                                | (Yu et al., 2009)                                    | 27F (5'-AGAGTTTGATCCTGGCTCAG-3'), 1495R (5'-CTACGGCTACCTTGTTA                                                                     | Genera: <i>Lactococcus</i> (51.46%), <i>Streptococcus</i> (17.81%), <i>Pseudomonas</i> (5.48%), <i>Acetobacter</i> (4.83%), <i>Klebsiella</i> (3.36%), <i>Lactobacillus</i> (2.36%), <i>Acinetobacter</i> (1.84%), and <i>Raoultella</i> (1.63%). <i>Lc. lactis</i> (43.89%), <i>S. thermophilus</i> (8.52%), <i>Lactococcus raffinolactis</i> (6.12%), <i>Acetobacter cibiongensis</i> (4.80%),                                                                                                                                                                                                                                                                                                                                                                                                                                                                                                                                                                                                                                                                                                                                                                                                                                                                                                                    | Not analyzed | 9,596.85 ± 2,512.28 high-quality sequences per sample                             | (Jin et al. 2018)            |

|  |  |  |  |  |                                         |                                                                                                                                                                 |  |  |  |
|--|--|--|--|--|-----------------------------------------|-----------------------------------------------------------------------------------------------------------------------------------------------------------------|--|--|--|
|  |  |  |  |  | CGA-3'), full length<br>16S rRNA region | <i>Lactobacillus helveticus</i> (1.95%), <i>Klebsiella pneumonia</i> (1.76%),<br><i>Acinetobacter johnsonii</i> (1.28%), and <i>Klebsiella oxytoca</i> (1.11%). |  |  |  |
|--|--|--|--|--|-----------------------------------------|-----------------------------------------------------------------------------------------------------------------------------------------------------------------|--|--|--|
